# Supplementary material
Source: PubMed Central journal article supplement (PMC11213643)
Supplement: NIHMS1972085-supplement-Supplementary_information.pdf [file NIHMS1972085-supplement-Supplementary_information.pdf]

Table-of-contents

Supplementary Figure 1. Gating strategy for flow cytometry data

Supplementary Table 1. Identification of cardiolipin molecular species in cells and tissues

Supplementary Table 2. Identification of mono-lyso-cardiolipin molecular species in cells and tissues

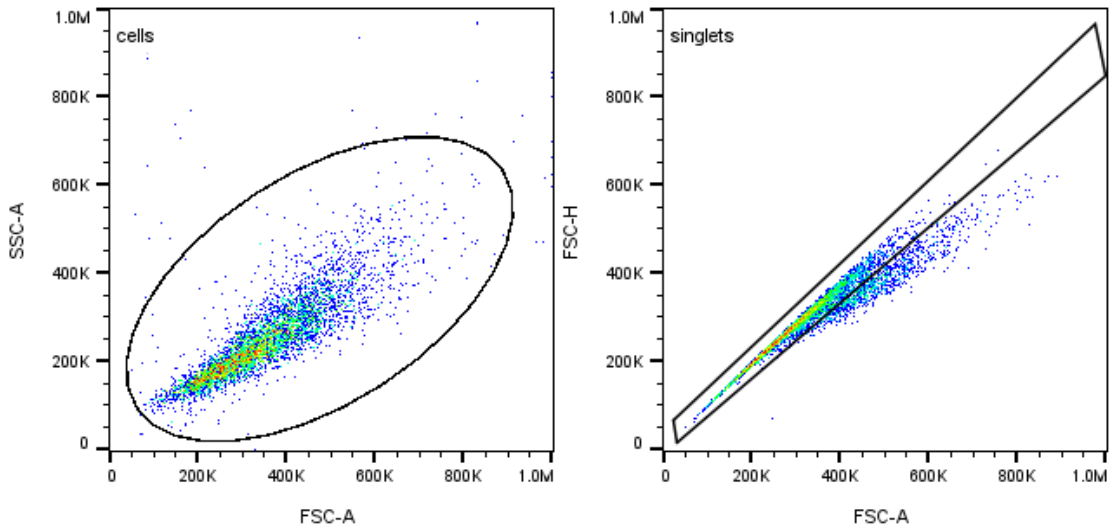

Supplementary Figure 1: **Gating strategy for flow cytometry data.**

Representative plots exemplifying the gating strategy employed to identify and exclude cell aggregates and debris from analysis based on scatter measurements. For all experiments, a "cells" gate was applied (*Left panel*) to distinguish between cells and debris by comparing side scatter area (SSC-A) and forward scatter area (FSC-A) of objects. Similarly, a "singlets" gate (*right panel*) was utilized to exclude cell aggregates by comparing forward scatter-height (FSC-H) and FSC-A. The demarcated regions in each panel indicate cells that were included in the analysis.

Supplementary Table 1. Identification of cardiolipin molecular species in cells and tissues

| Exact m/z | CN:DB | C2C12 cell (WT)                                                                                                                                                                                  | C2C12 cells (TAZ KO)                                                                                                                                         |
|-----------|-------|--------------------------------------------------------------------------------------------------------------------------------------------------------------------------------------------------|--------------------------------------------------------------------------------------------------------------------------------------------------------------|
| 1317.8867 | 62:3  | 14:0/16:1/16:1/16:1                                                                                                                                                                              | 14:0/18:1/14:0/16:1                                                                                                                                          |
| 1319.9024 | 62:2  | 14:0/16:1/14:0/18:1                                                                                                                                                                              | 14:0/16:1/14:0/18:1; 14:1/16:0/14:0/18:1                                                                                                                     |
| 1321.9180 | 62:1  |                                                                                                                                                                                                  | 14:0/16:0/14:0/18:1; 14:0/16:0/16:0/16:1                                                                                                                     |
| 1343.9024 | 64:4  | 14:0/ <u>18:2</u> /14:0/ <u>18:2</u> ; 16:1/16:1/16:1/16:1                                                                                                                                       | 16:1/16:1/16:1/16:1                                                                                                                                          |
| 1345.9180 | 64:3  | 14:0/ <u>18:2</u> /14:0/18:1; 16:0/16:1/16:1/16:1; 14:0/18:1/16:1/16:1                                                                                                                           | 14:0/ <u>18:2</u> /14:0/18:1; 14:0/16:0/16:0/ <u>18:3</u>                                                                                                    |
| 1347.9337 | 64:2  | 14:0/18:1/14:0/18:1; 16:0/16:1/16:0/16:1                                                                                                                                                         | 14:0/18:1/14:0/18:1; 16:0/16:1/16:0/16:1                                                                                                                     |
| 1349.9493 | 64:1  |                                                                                                                                                                                                  | 16:0/16:1/16:0/16:0                                                                                                                                          |
| 1369.9180 | 66:5  | 16:1/16:1/16:1/ <u>18:2</u>                                                                                                                                                                      | 14:0/16:1/16:0/ <u>20:4</u>                                                                                                                                  |
| 1371.9337 | 66:4  | 16:0/16:1/16:1/ <u>18:2</u> ; 16:1/16:1/16:1/18:1                                                                                                                                                | 16:1/16:1/16:1/18:1; 16:0/16:1/16:1/ <u>18:2</u>                                                                                                             |
| 1373.9493 | 66:3  | 16:0/16:1/16:1/18:1; 16:0/16:1/16:0/ <u>18:2</u> ; 14:0/18:1/16:1/18:1                                                                                                                           | 14:0/16:1/18:1/18:1; 14:0/18:1/16:0/ <u>18:2</u> ; 14:1/16:0/18:1/18:1                                                                                       |
| 1375.9650 | 66:2  | 16:0/16:1/16:0/18:1; 14:0/18:1/16:0/18:1                                                                                                                                                         | 14:0/18:1/16:0/18:1; 16:0/18:1/16:0/16:1                                                                                                                     |
| 1377.9806 | 66:1  |                                                                                                                                                                                                  | 16:0/18:1/16:0/16:0                                                                                                                                          |
| 1395.9337 | 68:6  | 16:1/18:2/16:1/ <u>18:2</u> ; 16:1/ <u>18:2</u> /16:0/ <u>18:3</u> ; 16:1/18:1/16:1/18:3                                                                                                         | 16:0/16:1/16:1/ <u>20:4</u>                                                                                                                                  |
| 1397.9493 | 68:5  | 16:0/ <u>18:2</u> /16:1/ <u>18:2</u> ; 16:0/18:1/16:1/ <u>18:3</u> ; 14:0/18:1/18:2/ <u>18:2</u>                                                                                                 | 16:0/16:1/16:0/ <u>20:4</u> ; 14:0/18:1/16:0/ <u>20:4</u>                                                                                                    |
| 1399.9650 | 68:4  | 16:1/18:1/16:0/ <u>18:2</u> ; 16:0/ <u>18:2</u> /16:0/ <u>18:2</u> ; 14:1/18:1/18:1/18:1                                                                                                         | 16:0/16:0/16:0/ <u>20:4</u> ; 14:0/18:1/18:1/ <u>18:2</u> ; 16:0/ <u>18:2</u> /16:0/ <u>18:2</u> ; 16:1/18:1/16:1/18:1                                       |
| 1401.9806 | 68:3  | 16:0/18:1/16:0/ <u>18:2</u> ; 16:1/18:1/16:0/18:1                                                                                                                                                | 16:0/16:1/16:0/ <u>20:2</u> ; 16:0/18:1/16:0/ <u>18:2</u> ; 14:0/18:1/18:1/18:1                                                                              |
| 1403.9963 | 68:2  | 16:0/18:1/16:0/18:1                                                                                                                                                                              | 16:0/18:1/16:0/18:1                                                                                                                                          |
| 1421.9493 | 70:7  | 16:1/ <u>18:2</u> / <u>18:2</u> / <u>18:2</u> ; 16:0/20:4/16:1/ <u>18:2</u> ; 16:1/ <u>20:4</u> /16:1/18:1                                                                                       |                                                                                                                                                              |
| 1423.9650 | 70:6  | 16:1/18:1/18:1/ <u>18:3</u> ; 16:0/ <u>20:4</u> /16:0/ <u>18:2</u> ; 16:1/ <u>20:3</u> /16:1/18:1                                                                                                | 16:0/16:0/18:1/ <u>20:5</u> ; 16:0/16:1/18:1/ <u>20:4</u>                                                                                                    |
| 1425.9806 | 70:5  | 16:0/ <u>18:2</u> /18:1/ <u>18:2</u> ; 16:1/18:1/18:1/ <u>18:2</u>                                                                                                                               | 16:0/18:1/16:0/ <u>20:4</u> ; 16:1/18:1/18:1/ <u>18:2</u>                                                                                                    |
| 1427.9963 | 70:4  | 16:1/18:1/18:1/18:1; 16:0/18:1/18:1/ <u>18:2</u>                                                                                                                                                 | 16:0/18:0/16:0/ <u>20:4</u> ; 16:0/18:0/16:1/ <u>20:3</u> ; 16:0/ <u>18:2</u> /18:0/ <u>18:2</u> ; 16:1/18:1/18:1/18:1                                       |
| 1430.0119 | 70:3  |                                                                                                                                                                                                  | 16:0/18:1/18:0/ <u>18:2</u>                                                                                                                                  |
| 1432.0276 | 70:2  |                                                                                                                                                                                                  | 16:0/18:1/18:0/18:1; 16:0/ <u>18:2</u> /18:0/18:0; 14:0/18:0/18:0/ <u>20:2</u>                                                                               |
| 1447.9650 | 72:8  | <u>18:2</u> / <u>18:2</u> / <u>18:2</u> / <u>18:2</u> ; 18:1/ <u>18:2</u> /16:1/ <u>20:4</u> ; <u>18:2</u> / <u>18:2</u> /16:1/ <u>20:3</u>                                                      |                                                                                                                                                              |
| 1449.9806 | 72:7  | 18:1/ <u>18:2</u> / <u>18:2</u> / <u>18:2</u> ; 18:1/18:1/16:1/ <u>20:4</u> ; 18:1/ <u>18:2</u> /16:1/ <u>20:3</u>                                                                               | 18:1/18:1/16:1/ <u>20:4</u> ; 18:1/ <u>18:2</u> / <u>18:2</u> / <u>18:2</u> ; 18:1/ <u>18:2</u> /16:0/ <u>20:4</u>                                           |
| 1451.9963 | 72:6  | 18:1/ <u>18:2</u> /18:1/ <u>18:2</u> ; 18:1/18:1/16:0/ <u>20:4</u> ; 18:1/18:1/16:1/ <u>20:3</u> ; 18:1/18:2/16:1/ <u>20:2</u>                                                                   | 18:1/ <u>18:2</u> /18:1/ <u>18:2</u> ; 18:1/18:1/16:0/ <u>20:4</u> ; 18:0/18:1/16:1/ <u>20:4</u> ; 18:0/18:2/16:0/ <u>20:4</u>                               |
| 1454.0119 | 72:5  | 18:1/18:1/18:1/ <u>18:2</u> ; 18:1/18:1/16:0/ <u>20:3</u>                                                                                                                                        | 18:1/18:1/18:1/ <u>18:2</u> ; 18:0/ <u>18:2</u> /18:1/ <u>18:2</u> ; 18:0/18:0/16:1/ <u>20:4</u> ; 18:0/18:1/16:0/ <u>20:4</u> ; 18:1/18:1/16:1/ <u>20:2</u> |
| 1456.0276 | 72:4  | 18:0/18:1/18:1/ <u>18:2</u> ; 18:1/18:1/18:1/18:1                                                                                                                                                | 18:1/18:1/18:1/18:1; 18:0/18:0/16:0/ <u>20:4</u> ; 18:0/ <u>18:2</u> /18:1/18:1                                                                              |
| 1471.9650 | 74:10 |                                                                                                                                                                                                  | <u>18:2</u> / <u>18:2</u> / <u>18:2</u> / <u>20:4</u>                                                                                                        |
| 1473.9806 | 74:9  | <u>18:2</u> / <u>18:2</u> /18:1/ <u>20:4</u> ; <u>18:2</u> / <u>18:2</u> / <u>18:2</u> / <u>20:3</u> ; 18:1/ <u>18:2</u> /16:0/ <u>22:6</u> ; 18:1/18:1/16:1/ <u>22:6</u>                        | 18:1/ <u>18:2</u> / <u>18:2</u> / <u>20:4</u> ; 16:1/ <u>22:6</u> /18:1/18:1;                                                                                |
| 1475.9963 | 74:8  | 18:1/ <u>18:2</u> /18:1/ <u>20:4</u> ; <u>18:2</u> / <u>18:2</u> /18:1/ <u>20:3</u> ; 18:1/ <u>20:3</u> /16:1/ <u>20:3</u> ; 18:1/ <u>20:3</u> /16:0/ <u>20:4</u>                                | 18:1/ <u>18:2</u> /18:1/ <u>20:4</u> ; 18:0/ <u>20:4</u> /16:0/ <u>20:4</u> ; 18:1/18:1/16:0/ <u>22:6</u> ; 18:1/18:1/16:1/ <u>22:5</u>                      |
| 1478.0019 | 74:7  | 18:1/18:1/18:1/ <u>20:4</u> ; 18:1/ <u>18:2</u> /18:1/ <u>20:3</u> ; 18:1/ <u>18:2</u> / <u>18:2</u> / <u>20:2</u> ; 18:1/ <u>18:2</u> /18:0/ <u>20:4</u> ; 18:0/ <u>18:2</u> /16:0/ <u>22:5</u> | 18:1/18:1/18:1/ <u>20:4</u>                                                                                                                                  |
| 1480.0276 | 74:6  |                                                                                                                                                                                                  | 18:1/18:1/18:0/ <u>20:4</u>                                                                                                                                  |
| 1502.0119 | 76:9  | 18:1/ <u>20:3</u> /18:1/ <u>20:4</u> ; 18:1/ <u>20:3</u> / <u>18:2</u> / <u>20:3</u>                                                                                                             |                                                                                                                                                              |

CN- carbon number; DB-double bond number

Extended Data Table 1. (continued)

| Exact m/z | CN:DB | Mouse heart (WT)                                                                                              | Mouse Heart (TAZ KD)                                                                                                                                                  |
|-----------|-------|---------------------------------------------------------------------------------------------------------------|-----------------------------------------------------------------------------------------------------------------------------------------------------------------------|
| 1369.9180 | 66:5  |                                                                                                               | 14:1/ <u>18:2</u> / <u>16:0</u> / <u>18:2</u> ; 14:1/ <u>18:1</u> / <u>16:0</u> / <u>18:3</u>                                                                         |
| 1371.9337 | 66:4  |                                                                                                               | 14:0/ <u>18:0</u> / <u>14:0</u> / <u>20:4</u> ; 14:0/ <u>18:2</u> / <u>16:0</u> / <u>18:2</u>                                                                         |
| 1373.9493 | 66:3  |                                                                                                               | 16:0/ <u>16:1</u> / <u>16:1</u> / <u>18:1</u>                                                                                                                         |
| 1375.9650 | 66:2  |                                                                                                               | 14:0/ <u>16:0</u> / <u>18:1</u> / <u>18:1</u> ; 16:0/ <u>16:0</u> / <u>16:1</u> / <u>18:1</u>                                                                         |
| 1377.9806 | 66:1  |                                                                                                               | 16:0/ <u>18:0</u> / <u>14:0</u> / <u>18:1</u>                                                                                                                         |
| 1395.9337 | 68:6  |                                                                                                               | 14:0/ <u>18:2</u> / <u>18:2</u> / <u>18:2</u>                                                                                                                         |
| 1397.8896 | 68:5  |                                                                                                               | 14:0/ <u>18:1</u> / <u>18:2</u> / <u>18:2</u>                                                                                                                         |
| 1399.9650 | 68:4  |                                                                                                               | 16:0/ <u>16:1</u> / <u>18:1</u> / <u>18:2</u> ; 16:0/ <u>16:0</u> / <u>18:2</u> / <u>18:2</u>                                                                         |
| 1401.9806 | 68:3  |                                                                                                               | 16:0/ <u>16:0</u> / <u>18:1</u> / <u>18:2</u>                                                                                                                         |
| 1403.9963 | 68:2  |                                                                                                               | 16:0/ <u>16:0</u> / <u>18:1</u> / <u>18:1</u>                                                                                                                         |
| 1419.9337 | 70:8  | <u>16:2</u> / <u>18:2</u> / <u>18:2</u> / <u>18:2</u>                                                         |                                                                                                                                                                       |
| 1421.9493 | 70:7  | <u>16:1</u> / <u>18:2</u> / <u>18:2</u> / <u>18:2</u>                                                         | <u>16:1</u> / <u>18:2</u> / <u>18:2</u> / <u>18:2</u>                                                                                                                 |
| 1423.9650 | 70:6  | <u>16:0</u> / <u>18:2</u> / <u>18:2</u> / <u>18:2</u>                                                         | <u>16:0</u> / <u>18:1</u> / <u>18:2</u> / <u>18:3</u> ; <u>16:1</u> / <u>18:1</u> / <u>18:1</u> / <u>18:3</u> ; <u>16:1</u> / <u>18:2</u> / <u>18:1</u> / <u>18:2</u> |
| 1425.9806 | 70:5  | <u>16:0</u> / <u>18:1</u> / <u>18:2</u> / <u>18:2</u>                                                         | <u>16:0</u> / <u>18:1</u> / <u>18:2</u> / <u>18:2</u> ; <u>16:0</u> / <u>18:1</u> / <u>18:1</u> / <u>18:3</u> ; <u>16:1</u> / <u>18:1</u> / <u>18:1</u> / <u>18:2</u> |
| 1427.9963 | 70:4  |                                                                                                               | <u>16:0</u> / <u>18:2</u> / <u>18:1</u> / <u>18:1</u> ; <u>16:1</u> / <u>18:1</u> / <u>18:0</u> / <u>18:2</u>                                                         |
| 1430.0119 | 70:3  |                                                                                                               | <u>16:0</u> / <u>18:3</u> / <u>18:0</u> / <u>18:0</u> ; <u>16:0</u> / <u>18:0</u> / <u>18:1</u> / <u>18:2</u> ; <u>16:0</u> / <u>18:1</u> / <u>18:1</u> / <u>18:1</u> |
| 1445.9493 | 72:9  | <u>18:2</u> / <u>18:2</u> / <u>18:2</u> / <u>18:3</u>                                                         | <u>18:2</u> / <u>18:2</u> / <u>18:2</u> / <u>18:3</u>                                                                                                                 |
| 1447.9650 | 72:8  | <u>18:2</u> / <u>18:2</u> / <u>18:2</u> / <u>18:2</u>                                                         | <u>18:2</u> / <u>18:2</u> / <u>18:2</u> / <u>18:2</u> ; <u>18:1</u> / <u>18:2</u> / <u>18:2</u> / <u>18:3</u>                                                         |
| 1449.9806 | 72:7  | <u>18:1</u> / <u>18:2</u> / <u>18:2</u> / <u>18:2</u>                                                         |                                                                                                                                                                       |
| 1451.9963 | 72:6  | <u>18:1</u> / <u>18:1</u> / <u>18:2</u> / <u>18:2</u>                                                         | <u>18:1</u> / <u>18:1</u> / <u>18:1</u> / <u>18:3</u> ; <u>18:1</u> / <u>18:2</u> / <u>18:1</u> / <u>18:2</u>                                                         |
| 1454.0119 | 72:5  | <u>18:1</u> / <u>18:1</u> / <u>18:1</u> / <u>18:2</u>                                                         | <u>18:1</u> / <u>18:1</u> / <u>18:1</u> / <u>18:2</u>                                                                                                                 |
| 1456.0276 | 72:4  |                                                                                                               | <u>18:1</u> / <u>18:1</u> / <u>18:1</u> / <u>18:1</u> ; <u>16:0</u> / <u>20:2</u> / <u>18:1</u> / <u>18:1</u>                                                         |
| 1469.9493 | 74:11 | <u>18:2</u> / <u>18:2</u> / <u>16:1</u> / <u>22:6</u>                                                         |                                                                                                                                                                       |
| 1471.9963 | 74:10 | <u>18:2</u> / <u>18:2</u> / <u>18:2</u> / <u>20:4</u>                                                         | <u>18:2</u> / <u>18:2</u> / <u>18:2</u> / <u>20:4</u>                                                                                                                 |
| 1473.9806 | 74:9  | <u>18:1</u> / <u>18:2</u> / <u>18:2</u> / <u>20:4</u> ; <u>18:2</u> / <u>18:2</u> / <u>18:2</u> / <u>20:3</u> | <u>18:1</u> / <u>18:2</u> / <u>18:2</u> / <u>20:4</u>                                                                                                                 |
| 1475.9963 | 74:8  | <u>18:1</u> / <u>18:2</u> / <u>18:2</u> / <u>20:3</u> ; <u>18:2</u> / <u>18:2</u> / <u>18:2</u> / <u>20:2</u> | <u>18:1</u> / <u>18:2</u> / <u>18:3</u> / <u>20:2</u>                                                                                                                 |
| 1478.0119 | 74:7  | <u>18:1</u> / <u>18:2</u> / <u>18:2</u> / <u>20:2</u>                                                         | <u>18:2</u> / <u>18:2</u> / <u>18:1</u> / <u>20:2</u> ; <u>18:2</u> / <u>18:2</u> / <u>18:0</u> / <u>20:3</u> ; <u>18:1</u> / <u>18:1</u> / <u>18:2</u> / <u>20:3</u> |
| 1480.0276 | 74:6  | <u>18:1</u> / <u>18:2</u> / <u>18:1</u> / <u>20:2</u>                                                         | <u>18:1</u> / <u>18:2</u> / <u>18:1</u> / <u>20:2</u>                                                                                                                 |
| 1495.9650 | 76:12 | <u>18:2</u> / <u>18:2</u> / <u>18:2</u> / <u>22:6</u>                                                         | <u>18:2</u> / <u>18:2</u> / <u>18:2</u> / <u>22:6</u>                                                                                                                 |
| 1497.9806 | 76:11 | <u>18:2</u> / <u>18:2</u> / <u>18:1</u> / <u>22:6</u>                                                         | <u>18:2</u> / <u>18:2</u> / <u>18:1</u> / <u>22:6</u>                                                                                                                 |
| 1499.9963 | 76:10 | <u>18:1</u> / <u>18:2</u> / <u>18:2</u> / <u>22:5</u>                                                         | <u>18:1</u> / <u>20:4</u> / <u>18:1</u> / <u>20:4</u> ; <u>18:1</u> / <u>18:2</u> / <u>18:2</u> / <u>22:5</u>                                                         |
| 1502.0119 | 76:9  | <u>18:2</u> / <u>18:2</u> / <u>20:3</u> / <u>20:2</u>                                                         | <u>18:2</u> / <u>18:2</u> / <u>18:3</u> / <u>20:2</u>                                                                                                                 |
| 1504.0276 | 76:8  |                                                                                                               | <u>18:0</u> / <u>18:2</u> / <u>18:0</u> / <u>22:6</u> ; <u>18:0</u> / <u>20:4</u> / <u>18:0</u> / <u>20:4</u>                                                         |

CN- carbon number; DB-double bond number

Supplementary Table 1. (continued)

| Exact m/z | CN:DB | Human lymphocytes (Control)                                   | Human lymphocytes (Barth syndrome)                                                                                           |
|-----------|-------|---------------------------------------------------------------|------------------------------------------------------------------------------------------------------------------------------|
| 1371.9337 | 66:4  | 14:0/16:1/18:1/ <u>18:2</u>                                   | 12:0/18:1/18:1/ <u>18:2</u> ; 14:0/16:1/18:1/ <u>18:2</u> ; 16:0/16:1/16:1/ <u>18:2</u> ; 16:0/16:1/16:0/ <u>18:3</u>        |
| 1373.9493 | 66:3  | 14:0/16:1/18:1/18:1                                           | 12:0/18:1/18:1/18:1; 14:0/16:1/18:1/18:1; 16:0/16:1/16:1/18:1; 16:0/16:1/16:0/ <u>18:2</u>                                   |
| 1375.9650 | 66:2  |                                                               | 14:0/16:0/18:1/18:1; 16:0/16:0/16:1/18:1                                                                                     |
| 1387.9650 | 67:3  |                                                               | 16:0/16:1/17:1/18:1                                                                                                          |
| 1393.9180 | 68:7  | 14:1/ <u>18:2/18:2/18:2</u>                                   |                                                                                                                              |
| 1395.9337 | 68:6  | 14:0/18:2/18:2/18:2; 16:1/16:1/18:2/18:2; 14:0/16:1/18:2/20:3 | 14:0/18:2/18:2/18:2; 14:1/18:1/18:2/18:2; 16:1/18:2/16:1/18:2                                                                |
| 1397.9493 | 68:5  | 16:1/16:1/18:1/ <u>18:2</u>                                   | 14:0/18:1/18:2/18:2; 14:1/18:1/18:1/18:2; 16:1/16:1/18:1/18:2; 16:0/16:1/18:1/ <u>18:3</u>                                   |
| 1399.9650 | 68:4  | 14:0/18:2/18:1/18:1; 16:1/16:1/18:1/18:1                      | 14:0/18:2/18:1/18:1; 14:1/18:1/18:1/18:1; 16:0/16:1/18:1/18:2; 16:0/16:0/18:2/18:2; 16:0/16:0/18:1/18:3; 16:0/16:0/16:0/20:4 |
| 1401.9806 | 68:3  |                                                               | 14:0/18:2/18:0/18:1; 16:0/16:1/18:1/18:1; 16:0/16:1/18:0/18:2                                                                |
| 1403.9963 | 68:2  |                                                               | 14:0/18:0/18:1/18:1; 14:0/18:0/18:0/18:2; 16:0/18:1/16:0/18:1; 16:0/16:0/18:0/18:2                                           |
| 1421.9493 | 70:7  | 16:1/18:2/18:2/18:2; 14:0/18:2/18:2/20:3                      | 14:0/18:1/18:2/20:4; 14:1/18:1/18:1/20:4; 16:0/16:1/18:2/20:4; 16:0/18:2/18:2/18:3; 16:1/18:2/18:2/18:2                      |
| 1423.9650 | 70:6  | 16:1/18:2/18:1/18:2; 14:0/18:1/18:2/20:3                      | 14:0/18:1/18:1/20:4; 16:0/16:1/18:1/20:4; 16:0/18:1/18:2/18:3; 16:1/18:1/18:1/18:3; 16:0/18:2/18:2/18:2; 16:1/18:2/18:1/18:2 |
| 1425.9806 | 70:5  | 16:0/18:1/18:2/18:2; 16:1/18:1/18:1/18:2                      | 16:0/18:1/18:2/18:2; 16:0/18:1/18:1/18:3; 16:1/18:1/18:1/18:2                                                                |
| 1427.9963 | 70:4  | 16:1/18:1/18:1/18:1                                           | 16:0/18:2/18:1/18:1; 16:1/18:1/18:1/18:1; 16:1/18:0/18:1/18:2                                                                |
| 1435.9650 | 71:7  | 16:1/17:1/18:2/20:3                                           | 16:0/17:1/18:2/20:4                                                                                                          |
| 1437.9806 | 71:6  | 16:1/17:1/18:1/20:3                                           |                                                                                                                              |
| 1439.9963 | 71:5  | 16:0/17:1/18:1/20:3                                           |                                                                                                                              |
| 1442.0119 | 71:4  | 16:0/17:1/18:1/20:2                                           |                                                                                                                              |
| 1445.9493 | 72:9  | <u>18:2/18:2/18:2/18:3</u>                                    |                                                                                                                              |
| 1447.9650 | 72:8  | <u>18:2/18:2/18:2/18:2</u>                                    | <u>18:2/18:2/18:2/18:2</u> ; <u>18:2/18:2/16:0/20:4</u> ; 18:1/18:3/16:0/20:4                                                |
| 1449.9806 | 72:7  | 18:1/18:2/18:2/18:2; 18:1/18:1/16:1/20:4                      | 18:1/18:2/18:1/18:3; 18:1/18:2/18:2/18:2; 18:1/18:1/16:1/20:4; 18:1/18:2/16:0/20:4                                           |
| 1451.9963 | 72:6  | 18:1/18:1/18:2/18:2; 18:1/18:1/16:1/20:3                      | 18:1/18:1/18:2/18:2; 18:1/18:1/18:1/18:3; 18:1/18:1/16:0/20:4                                                                |
| 1454.0119 | 72:5  | 18:1/18:1/18:1/18:2; 18:1/18:1/16:1/20:2                      | 18:1/18:1/18:1/18:2; 18:1/18:1/16:0/20:3                                                                                     |
| 1456.0276 | 72:4  | 18:1/18:1/18:1/18:1                                           | 18:1/18:1/18:1/18:1; 18:2/18:2/18:0/18:0                                                                                     |
| 1471.9650 | 74:10 | 16:1/18:1/18:2/22:6; 16:1/20:4/18:1/20:4                      | 16:1/20:4/18:1/20:4                                                                                                          |
| 1473.9806 | 74:9  | 16:1/18:1/18:2/22:5; 18:2/18:2/18:1/20:4                      | 18:1/18:2/16:0/22:6; 16:0/20:4/18:1/20:4                                                                                     |
| 1475.9963 | 74:8  | <u>18:2/18:2/18:1/20:3</u> ; 18:1/18:2/18:1/20:4              | 18:0/18:2/16:0/22:6                                                                                                          |
| 1478.0019 | 74:7  | 18:1/18:1/18:1/20:4; 18:1/18:2/18:1/20:3                      | 18:1/18:1/18:1/20:4                                                                                                          |
| 1480.0276 | 74:6  | 18:0/18:0/16:0/22:6; 18:1/18:1/18:0/20:4                      | 18:0/18:0/16:0/22:6; 18:1/18:1/18:0/20:4                                                                                     |
| 1497.9806 | 76:11 | <u>18:2/18:2/18:1/22:6</u> ; <u>18:2/18:2/20:4/20:3</u>       | 16:0/22:5/18:2/20:4; 16:0/22:6/18:1/20:4; 18:1/18:3/20:4/20:3                                                                |
| 1499.9963 | 76:10 | <u>18:2/18:2/18:1/22:5</u> ; 18:1/18:2/20:4/20:3              |                                                                                                                              |
| 1502.0119 | 76:9  | 16:1/22:5/18:0/20:4; 18:1/18:2/20:3/20:3                      | 16:0/22:5/18:0/20:4; 16:0/22:6/18:1/20:2; <u>18:2/18:2/18:0/22:5</u> ; 18:1/18:2/20:3/20:3                                   |
| 1504.0276 | 76:8  | 18:1/18:1/18:1/22:5; 18:1/18:0/20:4/20:3                      | 18:0/20:4/18:0/20:4; 18:1/18:1/18:1/22:5; 18:0/20:4/18:1/20:3                                                                |
| 1506.0432 | 76:7  | 18:1/18:1/18:1/22:4; 18:0/20:3/18:0/20:4                      |                                                                                                                              |
| 1528.0276 | 78:10 | 18:0/20:4/18:0/22:6; 16:0/22:4/18:0/22:6                      |                                                                                                                              |

CN- carbon number; DB-double bond number

Supplementary Table 1. (continued)

| Exact m/z | CN:DB | Human heart tissue (Control )                                                     | Human heart tissue (Barth syndrome)                                                                                          |
|-----------|-------|-----------------------------------------------------------------------------------|------------------------------------------------------------------------------------------------------------------------------|
| 1371.9337 | 66:4  |                                                                                   | 12:0/18:1/18:1/18:2; 14:0/16:1/18:1/18:2; 16:0/16:1/16:1/18:2; 16:0/16:1/16:0/18:3                                           |
| 1373.9493 | 66:3  |                                                                                   | 12:0/18:1/18:1/18:1; 14:0/16:1/18:1/18:1; 16:0/16:1/16:1/18:1; 16:0/16:1/16:0/18:2                                           |
| 1375.9650 | 66:2  |                                                                                   | 14:0/16:0/18:1/18:1; 16:0/16:0/16:1/18:1                                                                                     |
| 1393.9180 | 68:7  | 14:1/18:2/18:2/18:2                                                               |                                                                                                                              |
| 1395.9337 | 68:6  | 14:0/18:2/18:2/18:2; 16:1/18:2/16:1/18:2                                          | 14:0/18:2/18:2/18:2; 14:1/18:1/18:2/18:2; 16:1/18:2/16:1/18:2                                                                |
| 1397.8896 | 68:5  |                                                                                   | 14:0/18:1/18:2/18:2; 14:1/18:1/18:1/18:2; 16:1/16:1/18:1/18:2; 16:0/16:1/18:1/18:3                                           |
| 1399.9650 | 68:4  | 14:0/18:1/18:1/18:2; 16:0/16:1/18:1/18:2; 16:0/16:0/18:2/18:2                     | 14:0/18:1/18:1/18:2; 14:1/18:1/18:1/18:1; 16:0/16:1/18:1/18:2; 16:0/16:0/18:2/18:2; 16:0/16:0/18:1/18:3; 16:0/16:0/16:0/20:4 |
| 1401.9806 | 68:3  |                                                                                   | 14:0/18:2/18:0/18:1; 16:0/16:1/18:1/18:1; 16:0/16:1/18:0/18:2                                                                |
| 1403.9963 | 68:2  | 16:0/18:1/16:0/18:1                                                               | 14:0/18:0/18:1/18:1; 14:0/18:0/18:0/18:2; 16:0/18:1/16:0/18:1; 16:0/16:0/18:0/18:2                                           |
| 1421.9493 | 70:7  | 16:1/18:2/18:2/18:2                                                               | 14:0/18:1/18:2/20:4; 14:1/18:1/18:1/20:4; 16:0/16:1/18:2/20:4; 16:0/18:2/18:2/18:3; 16:1/18:2/18:2/18:2                      |
| 1423.9650 | 70:6  | 16:1/18:2/18:1/18:2                                                               | 14:0/18:1/18:1/20:4; 16:0/16:1/18:1/20:4; 16:0/18:1/18:2/18:3; 16:1/18:1/18:1/18:3; 16:0/18:2/18:2/18:2; 16:1/18:2/18:1/18:2 |
| 1425.9806 | 70:5  | 16:0/18:1/18:2/18:2; 16:1/18:1/18:1/18:2                                          | 16:0/18:1/18:2/18:2; 16:0/18:1/18:1/18:3; 16:1/18:1/18:1/18:2                                                                |
| 1427.9963 | 70:4  |                                                                                   | 16:0/18:2/18:1/18:1; 16:1/18:1/18:1/18:1; 16:1/18:2/18:0/18:1                                                                |
| 1445.9493 | 72:9  | 18:2/18:2/18:2/18:3                                                               |                                                                                                                              |
| 1447.9650 | 72:8  | 18:2/18:2/18:2/18:2                                                               | 18:2/18:2/18:2/18:2; 18:2/18:2/16:0/20:4; 18:1/18:3/16:0/20:4                                                                |
| 1449.9806 | 72:7  | 18:1/18:2/18:2/18:2                                                               | 18:1/18:2/18:1/18:3; 18:1/18:2/18:2/18:2; 18:1/18:1/16:1/20:4; 18:1/18:2/16:0/20:4                                           |
| 1451.9963 | 72:6  | 18:1/18:1/18:2/18:2                                                               | 18:1/18:2/18:1/18:2; 18:1/18:1/18:1/18:3; 18:1/18:1/16:0/20:4                                                                |
| 1454.0119 | 72:5  | 18:1/18:1/18:1/18:2                                                               | 18:1/18:1/18:1/18:2                                                                                                          |
| 1456.0276 | 72:4  | 18:1/18:1/18:1/18:1                                                               | 18:1/18:1/18:1/18:1; 18:0/18:2/18:0/18:2                                                                                     |
| 1471.9963 | 74:10 | 18:2/18:2/18:2/20:4                                                               | 18:2/18:2/18:2/20:4; 18:2/18:2/18:1/20:5                                                                                     |
| 1473.9806 | 74:9  | 18:1/18:2/18:2/20:4; 18:2/18:2/18:2/20:3                                          | 18:1/18:2/18:2/20:4; 18:1/18:3/18:1/20:4                                                                                     |
| 1475.9963 | 74:8  | 18:1/18:2/18:2/20:3; 18:2/18:2/18:2/20:2                                          | 18:0/18:2/16:0/22:6; 18:0/18:2/18:2/20:4; 18:1/18:2/18:1/20:4                                                                |
| 1478.0119 | 74:7  | 18:2/18:2/18:2/20:1; 18:1/18:2/18:2/20:2                                          | 18:1/18:1/18:1/20:4; 18:1/18:2/18:0/20:4; 18:1/18:2/18:1/20:3                                                                |
| 1480.0276 | 74:6  | 18:1/18:2/18:2/20:1; 18:2/18:2/18:2/20:0                                          | 18:0/18:1/18:1/20:4; 18:0/18:2/18:0/20:4; 18:0/18:2/18:1/20:3                                                                |
| 1495.9650 | 76:12 | 18:2/18:2/18:2/22:6; 18:1/18:3/18:2/22:6                                          | 18:2/18:2/18:2/22:6; 18:2/20:4/18:2/20:4                                                                                     |
| 1497.9806 | 76:11 | 18:2/18:2/18:1/22:6; 18:1/20:4/18:2/20:4                                          | 16:0/22:5/18:2/20:4; 16:0/22:6/18:1/20:4; 18:1/18:3/20:4/20:3                                                                |
| 1499.9963 | 76:10 | 18:2/18:2/18:1/22:5; 18:1/20:4/18:1/20:4 18:2/18:2/18:2/22:4; 18:1/20:4/18:2/20:3 | 18:1/20:4/18:1/20:4; 18:0/20:4/18:2/20:4                                                                                     |
| 1502.0119 | 76:9  |                                                                                   | 16:0/22:5/18:0/20:4; 16:0/22:6/18:1/20:2; 18:2/18:2/18:0/22:5; 18:1/20:4/18:2/20:2                                           |
| 1504.0276 | 76:8  |                                                                                   | 18:0/20:4/18:0/20:4                                                                                                          |

CN- carbon number; DB-double bond number

Supplementary Table 2. Identification of mono-lyso-cardiolipin molecular species in cells and tissues.

| Exact m/z | CN:DB | Cells C2C12 (WT)                                | C2C12 cells (TAZ KO)                                                     |
|-----------|-------|-------------------------------------------------|--------------------------------------------------------------------------|
| 1109.7040 | 48:2  | 14:0/16:1/18:1                                  | 14:0/16:0/ <u>18:2</u> ; 14:0/16:1/18:1                                  |
| 1111.7196 | 48:1  |                                                 | 14:0/16:0/18:1                                                           |
| 1113.7347 | 48:0  |                                                 | 16:0/16:0/16:0                                                           |
| 1135.7196 | 50:3  | 16:0/16:1/ <u>18:2</u> ; 16:1/16:1/18:1         | 16:0/16:1/ <u>18:2</u> ; 16:1/16:1/18:1                                  |
| 1137.7353 | 50:2  | 16:0/16:1/18:1; 14:0/18:1/18:1                  | 16:0/16:1/18:1; 14:0/18:1/18:1                                           |
| 1139.7504 | 50:1  | 16:0/16:0/18:1                                  | 16:0/16:0/18:1                                                           |
| 1159.7196 | 52:5  |                                                 | 16:0/16:1/ <u>20:4</u> ; 16:1/16:1/ <u>20:3</u>                          |
| 1161.7353 | 52:4  | 16:0/ <u>18:2/18:2</u> ; 16:1/18:1/ <u>18:2</u> | 16:0/16:0/ <u>20:4</u>                                                   |
| 1163.7509 | 52:3  | 16:0/18:1/ <u>18:2</u> ; 16:1/18:1/18:1         | 16:0/18:1/ <u>18:2</u> ; 16:1/18:1/18:1                                  |
| 1165.7666 | 52:2  | 16:1/18:0/18:1                                  | 16:0/18:1/18:1                                                           |
| 1183.7196 | 54:7  | <u>18:2/18:2/18:3</u>                           |                                                                          |
| 1185.7353 | 54:6  | <u>18:2/18:2/18:2</u>                           | 16:1/18:1/ <u>20:4</u> ; 16:0/18:1/ <u>20:5</u>                          |
| 1187.7509 | 54:5  | 18:1/ <u>18:2/18:2</u>                          | 16:0/18:1/ <u>20:4</u>                                                   |
| 1189.7666 | 54:4  | 18:1/18:1/ <u>18:2</u>                          |                                                                          |
| 1215.7822 | 56:5  | 18:1/ <u>18:2/20:2</u>                          | 18:1/ <u>18:2/20:2</u> ; 18:0/18:1/ <u>20:4</u> ; 18:0/18:0/ <u>20:5</u> |
| Exact m/z | CN:DB | Mouse heart (WT mice)                           | Mouse heart (TAZ KD mice)                                                |
| 1133.7040 | 50:4  |                                                 | 14:1/18:1/ <u>18:2</u> ; 16:1/16:1/ <u>18:2</u>                          |
| 1135.7196 | 50:3  |                                                 | 16:1/16:1/18:1                                                           |
| 1137.7353 | 50:2  |                                                 | 16:1/16:1/18:0                                                           |
| 1139.7504 | 50:1  |                                                 | 16:0/16:0/18:1                                                           |
| 1157.7034 | 52:6  |                                                 | 16:1/16:1/ <u>20:4</u>                                                   |
| 1159.7196 | 52:5  | 16:1/ <u>18:2/18:2</u>                          | 16:1/ <u>18:2/18:2</u>                                                   |
| 1161.7353 | 52:4  | 16:1/18:1/ <u>18:2</u>                          | 16:0/ <u>18:2/18:2</u> ; 16:1/18:1/ <u>18:2</u>                          |
| 1163.7509 | 52:3  |                                                 | 16:0/18:1/ <u>18:2</u> ; 16:1/18:1/18:1                                  |
| 1165.7666 | 52:2  |                                                 | 16:0/18:1/18:1                                                           |
| 1183.7196 | 54:7  | <u>18:2/18:2/18:3</u>                           | 16:1/ <u>18:2/20:4</u>                                                   |
| 1185.7353 | 54:6  | <u>18:2/18:2/18:2</u>                           | <u>18:2/18:2/18:2</u> ; 18:1/ <u>18:2/18:3</u>                           |
| 1187.7509 | 54:5  | <u>18:2/18:2/18:1</u>                           | 18:1/ <u>18:2/18:2</u>                                                   |
| 1189.7666 | 54:4  |                                                 | 18:1/18:1/ <u>18:2</u> ; 18:0/ <u>18:2/18:2</u>                          |
| 1191.7822 | 54:3  |                                                 | 18:0/18:1/ <u>18:2</u>                                                   |
| 1207.7191 | 56:9  |                                                 | 16:1/ <u>18:2/22:6</u> ; 16:1/ <u>20:4/20:4</u>                          |
| 1209.7353 | 56:8  | <u>18:2/18:2/20:4</u> ; 16:0/ <u>20:4/20:4</u>  | 16:1/18:1/ <u>22:6</u> ; 16:0/ <u>20:4/20:4</u> ; 18:2/ <u>18:2/20:4</u> |
| 1211.7509 | 56:7  | <u>18:2/18:2/20:3</u>                           | 18:1/ <u>18:2/20:4</u>                                                   |
| 1213.7666 | 56:6  | 18:1/ <u>18:2/20:3</u>                          | <u>18:2/18:2/20:2</u> ; 18:0/ <u>18:2/20:4</u>                           |
| 1215.7822 | 56:5  |                                                 | 18:1/ <u>18:2/20:2</u> ; 18:0/18:1/ <u>20:4</u>                          |
| 1217.7973 | 56:4  |                                                 | 18:1/18:1/ <u>20:2</u> ; 18:0/18:2/ <u>20:2</u> ; 18:1/ <u>18:2/20:1</u> |
| 1233.7353 | 58:10 | <u>18:2/18:2/22:6</u>                           | <u>18:2/20:4/20:4</u>                                                    |
| 1235.7509 | 58:9  | <u>18:2/18:2/22:5</u>                           | 18:1/ <u>18:2/22:6</u>                                                   |
| 1237.7666 | 58:8  |                                                 | 18:1/18:1/ <u>22:6</u> ; <u>18:2/18:1/22:5</u>                           |

CN- carbon number; DB-double bond number

Supplementary Table 2.(continued)

| Exact m/z | CN:DB | Human lymphocytes (Control)                     | Human lymphocytes (Barth syndrome)                                                                 |
|-----------|-------|-------------------------------------------------|----------------------------------------------------------------------------------------------------|
| 1109.7040 | 48:2  | 14:0/16:1/18:1                                  | 14:0/16:1/18:1                                                                                     |
| 1111.7040 | 48:1  |                                                 | 14:0/16:0/18:1                                                                                     |
| 1135.7196 | 50:3  | 16:1/16:1/18:1                                  |                                                                                                    |
| 1137.7353 | 50:2  | 14:0/18:1/18:1                                  | 14:0/18:1/18:1; 16:0/16:1/18:1                                                                     |
| 1157.7034 | 52:6  |                                                 | 16:1/16:1/ <u>20:4</u>                                                                             |
| 1159.7196 | 52:5  |                                                 | 14:0/18:1/ <u>20:4</u> ; 16:0/16:1/ <u>20:4</u>                                                    |
| 1161.7353 | 52:4  | 16:1/18:1/ <u>18:2</u>                          | 16:1/18:1/ <u>18:2</u> ; 16:0/16:0/ <u>20:4</u> ; 16:1/16:0/ <u>20:3</u>                           |
| 1163.7509 | 52:3  | 16:0/18:1/ <u>18:2</u> ; 16:1/18:1/18:1         | 16:1/18:1/18:1                                                                                     |
| 1165.7666 | 52:2  | 16:0/18:1/18:1                                  | 16:0/18:1/18:1                                                                                     |
| 1185.7353 | 54:6  | <u>18:2/18:2/18:2</u>                           | 16:1/18:1/ <u>20:4</u> ;                                                                           |
| 1187.7509 | 54:5  | 18:1/ <u>18:2/18:2</u>                          | 18:1/ <u>18:2/18:2</u> ; 16:1/18:1/ <u>20:3</u> ; 16:0/18:1/ <u>20:4</u>                           |
| 1189.7666 | 54:4  | 18:1/18:1/ <u>18:2</u>                          | 18:1/18:1/ <u>18:2</u>                                                                             |
| 1191.7822 | 54:3  | 18:1/18:1/18:1                                  | 18:1/18:1/18:1                                                                                     |
| 1211.7509 | 56:7  | <u>18:2/18:2/20:3</u>                           | 18:1/18:1/ <u>20:5</u>                                                                             |
| 1213.7666 | 56:6  | 18:1/18:1/ <u>20:4</u> ; 18:1/ <u>18:2/20:3</u> | 18:1/18:1/ <u>20:4</u>                                                                             |
| 1215.7822 | 56:5  | 18:1/18:1/ <u>20:3</u>                          | 18:0/18:1/ <u>20:4</u>                                                                             |
| 1237.7666 | 58:8  | 18:1/ <u>20:3/20:4</u>                          | 18:1/ <u>20:3/20:4</u> ; 18:1/18:1/ <u>22:6</u>                                                    |
| 1239.7822 | 58:7  |                                                 | 18:1/ <u>20:3/20:3</u> ; 18:1/18:1/ <u>22:5</u>                                                    |
| Exact m/z | CN:DB | Human heart tissue (Control)                    | Human heart tissue (Barth syndrome)                                                                |
| 1107.6883 | 48:3  |                                                 | 14:0/16:1/ <u>18:2</u> ; 16:1/16:1/16:1                                                            |
| 1109.7040 | 48:2  |                                                 | 14:0/16:1/18:1; 14:0/16:0/ <u>18:2</u>                                                             |
| 1111.7196 | 48:1  |                                                 | 14:0/16:0/18:1                                                                                     |
| 1133.7040 | 50:4  | 14:0/ <u>18:2/18:2</u>                          | 14:0/ <u>18:2/18:2</u> ; 14:1/18:1/ <u>18:2</u> ; 16:1/16:1/ <u>18:2</u>                           |
| 1135.7196 | 50:3  |                                                 | 14:0/18:1/ <u>18:2</u> ; 14:1/18:1/18:1; 16:1/16:1/18:1<br>16:0/16:1/ <u>18:2</u>                  |
| 1137.7353 | 50:2  | 14:0/18:1/18:1                                  | 14:0/18:1/18:1; 16:0/16:1/18:1; 16:0/16:0/ <u>18:2</u>                                             |
| 1159.7196 | 52:5  | 16:1/ <u>18:2/18:2</u>                          | 14:0/18:1/ <u>20:4</u> ; 16:0/16:1/ <u>20:4</u> ; 16:1/ <u>18:2/18:2</u>                           |
| 1161.7353 | 52:4  |                                                 | 16:0/ <u>18:2/18:2</u> ; 16:1/18:1/ <u>18:2</u>                                                    |
| 1163.7509 | 52:3  | 16:0/18:1/ <u>18:2</u> ; 16:1/18:1/18:1         | 16:0/18:1/ <u>18:2</u> ; 16:1/18:1/18:1                                                            |
| 1165.7666 | 52:2  | 16:0/18:1/18:1                                  | 16:0/18:1/18:1                                                                                     |
| 1183.7196 | 54:7  |                                                 | <u>18:2/18:2/18:3</u> ; 18:1/ <u>18:3/18:3</u> ; 16:0/ <u>18:3/20:4</u><br>16:1/ <u>18:2/20:4</u>  |
| 1185.7353 | 54:6  | <u>18:2/18:2/18:2</u>                           | <u>18:2/18:2/18:2</u> ; 18:1/ <u>18:2/18:3</u> ; 16:0/ <u>18:2/20:4</u><br>16:1/18:1/ <u>20:4</u>  |
| 1187.7509 | 54:5  |                                                 | 18:1/ <u>18:2/18:2</u> ; 16:0/18:1/ <u>20:4</u>                                                    |
| 1189.7666 | 54:4  | 18:1/18:1/ <u>18:2</u>                          | 18:1/18:1/ <u>18:2</u>                                                                             |
| 1191.7822 | 54:3  | 18:1/18:1/18:1                                  | 18:1/18:1/18:1; 18:1/18:0/ <u>18:2</u>                                                             |
| 1209.7353 | 56:8  | <u>18:2/18:2/20:4</u>                           | <u>18:2/18:2/20:4</u> ; 18:1/ <u>18:3/20:4</u>                                                     |
| 1211.7509 | 56:7  | 18:1/ <u>18:2/20:4</u> ; <u>18:2/18:2/20:3</u>  | 18:1/ <u>18:2/20:4</u>                                                                             |
| 1213.7666 | 56:6  | 18:1/18:1/ <u>20:4</u>                          | 18:1/18:1/ <u>20:4</u> ; 18:0/ <u>18:2/20:4</u>                                                    |
| 1215.7822 | 56:5  |                                                 | 18:0/18:1/ <u>20:4</u>                                                                             |
| 1233.7353 | 58:10 |                                                 | <u>18:2/20:4/20:4</u>                                                                              |
| 1235.7509 | 58:9  |                                                 | 18:1/ <u>20:4/20:4</u> ; <u>18:2/20:4/20:3</u> ; 18:1/ <u>18:2/22:6</u> ;<br><u>18:2/18:2/22:5</u> |
| 1237.7666 | 58:8  |                                                 | 18:0/ <u>20:4/20:4</u> ; 18:1/18:1/ <u>22:6</u> ; <u>18:2/18:1/22:5</u>                            |
| 1239.7822 | 58:7  |                                                 | 18:1/ <u>20:2/20:4</u> ; 18:1/18:1/ <u>22:5</u> ; 18:0/18:1/ <u>22:6</u>                           |

CN- carbon number; DB-double bond number
